# Supplementary material for: Degradability and Properties of PBAT-Based Biodegradable Mulch Films in Field and Their Effects on Cotton Planting
Source: MDPI journal article supplement (doi:10.3390/polym14153157), 2022-08-02
Supplement: s1 [file s1]

# Supplementary Materials: Degradability and Properties of PBAT-Based Biodegradable Mulch Films in Field and Their Effects on Cotton Planting

Qi Liu <sup>1</sup>, Yue Wang <sup>1</sup>, Jialei Liu <sup>1</sup>, Xiaowei Liu <sup>2</sup>, Yanyan Dong <sup>1</sup>, Xin Huang <sup>1</sup>, Zhichao Zhen <sup>3,\*</sup>, Jun Lv <sup>2,\*</sup> and Wenqing He <sup>1,\*</sup>

- <sup>1</sup> National Engineering Laboratory for Crop Efficient Water Use and Disaster Mitigation, Key Laboratory of Prevention and Control of Residual Pollution in Agricultural Film, Ministry of Agriculture and Rural Affairs, Institute of Environment and Sustainable Development in Agriculture, Chinese Academy of Agricultural Sciences, Beijing, 100081, China; liuqi@caas.cn (Q.L.); wyw111y@sina.com (Y.W.); liujialei@caas.cn (J.L.); dongyanyan@caas.cn (Y.D.); huangxinharris@sina.com (X.H.)
- <sup>2</sup> Shihezi Agricultural Science Research Institute, Xinjiang 832000, China; liuxiaowei1212@sina.com
- <sup>3</sup> Technical Institute of Physics and Chemistry, Chinese Academy of Sciences, Beijing 100045, China
- \* Correspondence: zhenzc1979@163.com (Z.Z.); lvjunshznky@sina.com (J.L.); hewenqing@caas.cn (W.H.)

**Table S1.** Basic agricultural application performances of the films for mulching.

| Samples | Base material     | Thickness (μm) | Light Transmittance (%) | Dislocation rate of Mechanical Perforating (%) |
|---------|-------------------|----------------|-------------------------|------------------------------------------------|
| BDM     | PBAT <sup>a</sup> | 10.2 ± 0.1     | 90.48 ± 1.34            | 91.79                                          |
| BDM1    | PBAT <sup>a</sup> | 10.3 ± 0.3     | 88.08 ± 2.41            | 91.93                                          |
| BDM2    | PBAT <sup>a</sup> | 9.9 ± 0.1      | 76.95 ± 4.72            | 91.00                                          |
| PE      | Polyethylene      | 8.9 ± 0.6      | 93.20 ± 0.87            | 91.53                                          |

<sup>a</sup>Abbreviation of Poly(butylene adipate-co-terephthalate).

**Table S2.** Basic physical and chemical properties of soil in the field-test site.

| Items   | Soil bulk density (g·cm <sup>-3</sup> ) | Organic matter (g·kg <sup>-1</sup> ) | Available nitrogen (mg·kg <sup>-1</sup> ) | Rapidly available phosphorus (mg·kg <sup>-1</sup> ) | Rapidly available potassium (mg·kg <sup>-1</sup> ) | pH          |
|---------|-----------------------------------------|--------------------------------------|-------------------------------------------|-----------------------------------------------------|----------------------------------------------------|-------------|
| Results | 1.38 ± 0.05                             | 30.41 ± 7.71                         | 69.33 ± 24.32                             | 26.22 ± 8.68                                        | 299.94 ± 36.11                                     | 7.87 ± 0.14 |

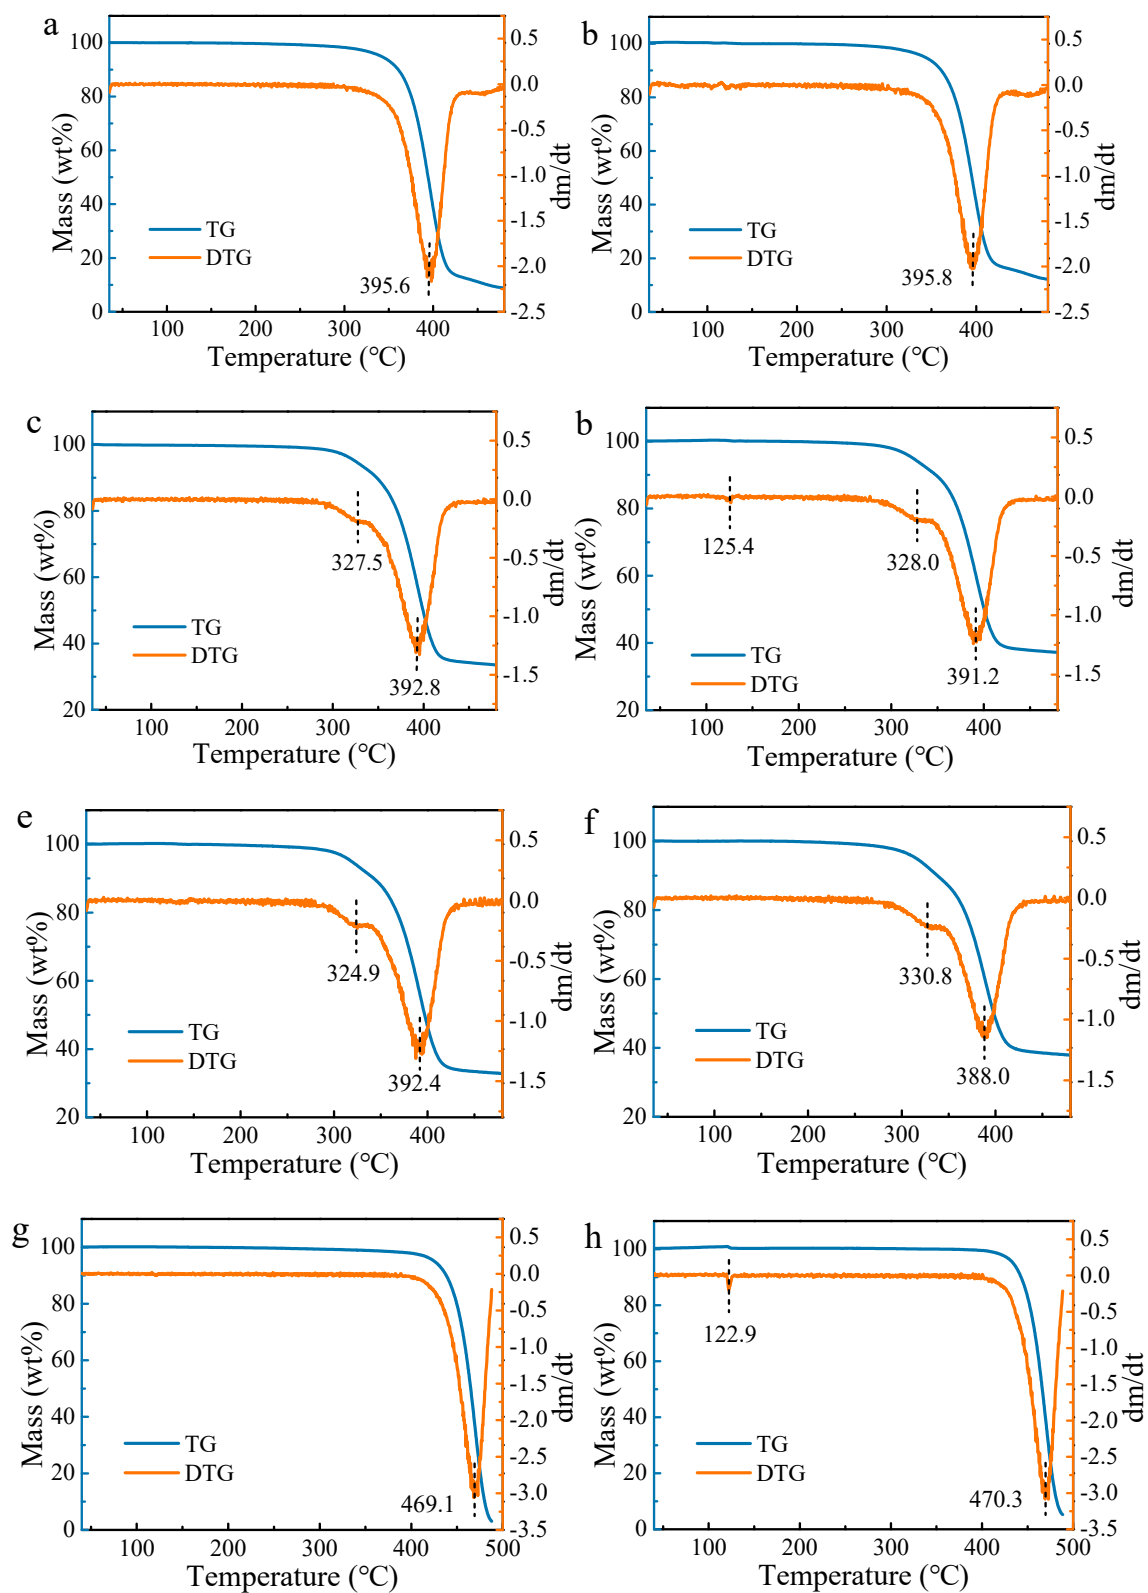

Figure S1. TG and DTG curves of BDM (a), BDM' (b), BDM1 (c), BDM1' (d), BDM2 (e), BDM2'(f), PE (g), and PE'(h).

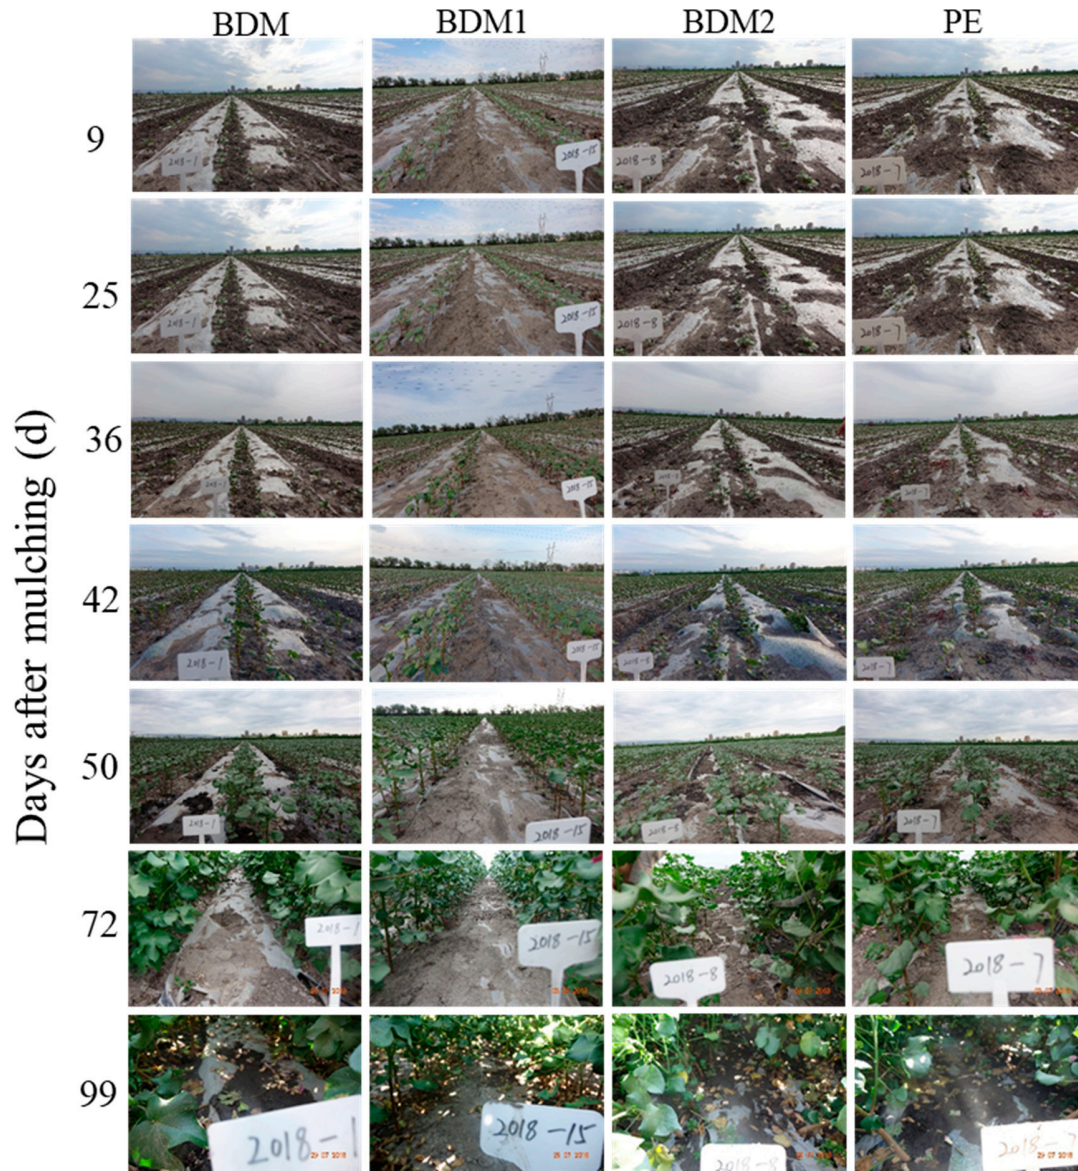

Figure S2. Degradation digital photos along a line of mulched cotton of BDM, BDM1, BDM2 and PE films during mulching period.
